# Supplementary material for: NEURO-COVAX: An Italian Population-Based Study of Neurological Complications after COVID-19 Vaccinations
Source: MDPI journal article supplement (doi:10.3390/vaccines11101621), 2023-10-21
Supplement: s1 [file s1]

**TABLE S1.** Defining onset and duration of neurological complications in the symptomatic group vaccinated in the massive Hub Novegro (Lombardy) between 7 July 2021 and 16 July 2021, distinguished according to the dose

| NEUROLOGICAL COMPLICATION      | <i>I DOSE(n)</i> |           |                |             | <i>II DOSE(n)</i> |           |                |            |
|--------------------------------|------------------|-----------|----------------|-------------|-------------------|-----------|----------------|------------|
|                                | BNT162b2         | mRNA-1273 | ChAdOx1nCov-19 | Total       | BNT162b2          | mRNA-1273 | ChAdOx1nCov-19 | Total      |
| <b>HEADACHE</b>                |                  |           |                |             |                   |           |                |            |
| <b>Onset</b>                   |                  |           |                |             |                   |           |                |            |
| <b>Acute</b>                   |                  |           |                |             |                   |           |                |            |
| -within 15 minutes             | 141              | 21        | 20             | 182         | 136               | 30        | 9              | 175        |
| -after 15 minutes              | 1039             | 161       | 144            | <b>1344</b> | 81                | 20        | 8              | 109        |
| <b>Subacute</b>                |                  |           |                |             |                   |           |                |            |
| - first hours                  | 720              | 111       | 104            | 935         | 99                | 24        | 13             | 136        |
| - first 3 days                 | 827              | 173       | 109            | 1109        | 177               | 36        | 11             | <b>224</b> |
| - from the 4th to the 7th day  | 55               | 5         | 5              | 65          | 7                 | 1         | 3              | 11         |
| - from the 8th to the 14th day | 34               | 5         | 3              | 42          | 7                 | -         | 3              | 10         |
| <b>Duration</b>                |                  |           |                |             |                   |           |                |            |
| -<10 minutes                   | 171              | 25        | 11             | 207         | 73                | 11        | 2              | 86         |
| ->10 minutes, less than a day  | 1032             | 160       | 157            | 1349        | 147               | 39        | 15             | 201        |
| - a day                        | 1105             | 189       | 149            | <b>1443</b> | 187               | 35        | 21             | <b>243</b> |
| -up to a week                  | 460              | 98        | 61             | 619         | 93                | 25        | 8              | 126        |
| -more than a week              | 80               | 8         | 24             | 112         | 10                | 1         | 1              | 2          |

| NEUROLOGICAL COMPLICATION           | <i>I DOSE (n)</i> |           |               |            | <i>II DOSE(n)</i> |           |                |            |
|-------------------------------------|-------------------|-----------|---------------|------------|-------------------|-----------|----------------|------------|
|                                     | BNT162b2          | mRNA-1273 | ChAdOx1nCov19 | Total      | BNT162b2          | mRNA-1273 | ChAdOx1nCov-19 | Total      |
| <b>EXCESSIVE DAYTIME SLEEPINESS</b> |                   |           |               |            |                   |           |                |            |
| <b>Onset</b>                        |                   |           |               |            |                   |           |                |            |
| <b>Acute</b>                        |                   |           |               |            |                   |           |                |            |
| -within 15 minutes                  | 47                | 4         | 5             | 56         | 20                | 4         | 2              | 26         |
| -after 15 minutes                   | 745               | 129       | 73            | <b>947</b> | 39                | 6         | 4              | 49         |
| <b>Subacute</b>                     |                   |           |               |            |                   |           |                |            |
| - first hours                       | 542               | 86        | 58            | 686        | 67                | 14        | 6              | 87         |
| - first 3 days                      | 687               | 119       | 58            | 864        | 129               | 22        | 7              | <b>158</b> |
| - from the 4th to the 7th day       | 44                | 6         | 1             | 51         | 6                 | -         | -              | 6          |
| - from the 8th to the 14th day      | 29                | 2         | 5             | 36         | 4                 | -         | 5              | 9          |
| <b>Duration</b>                     |                   |           |               |            |                   |           |                |            |
| -<10 minutes                        | 67                | 4         | 7             | 78         | 6                 | 1         | -              | 7          |
| ->10 minutes, less than a day       | 499               | 94        | 44            | 637        | 53                | 9         | 6              | 68         |
| - a day                             | 702               | 108       | 68            | 878        | 90                | 18        | 6              | 114        |
| -up to a week                       | 770               | 130       | 73            | <b>973</b> | 98                | 15        | 4              | <b>117</b> |
| -more than a week                   | 110               | 11        | 11            | 132        | 18                | 3         | 3              | 24         |

| NEUROLOGICAL COMPLICATION      | <i>I DOSE(n)</i> |           |                |            | <i>II DOSE(n)</i> |           |                |            |
|--------------------------------|------------------|-----------|----------------|------------|-------------------|-----------|----------------|------------|
|                                | BNT162b2         | mRNA-1273 | ChAdOx1nCov-19 | Total      | BNT162b2          | mRNA-1273 | ChAdOx1nCov-19 | Total      |
| <b>VERTIGO</b>                 |                  |           |                |            |                   |           |                |            |
| <b>Onset</b>                   |                  |           |                |            |                   |           |                |            |
| <b>Acute</b>                   |                  |           |                |            |                   |           |                |            |
| -within 15 minutes             | 158              | 25        | 9              | 192        | 89                | 23        | 10             | <b>122</b> |
| -after 15 minutes              | 236              | 45        | 30             | <b>311</b> | 36                | 2         | 5              | 43         |
| <b>Subacute</b>                |                  |           |                |            |                   |           |                |            |
| - first hours                  | 142              | 33        | 16             | 191        | 12                | 3         | 1              | 16         |
| - first 3 days                 | 133              | 22        | 16             | 171        | 13                | 2         | 2              | 17         |
| - from the 4th to the 7th day  | 22               | 1         | 1              | 24         | 1                 | -         | 1              | 2          |
| - from the 8th to the 14th day | 15               | 6         | 1              | 22         | 2                 | -         | -              | 2          |
| <b>Duration</b>                |                  |           |                |            |                   |           |                |            |
| -<10 minutes                   | 199              | 32        | 9              | 240        | 69                | 12        | 8              | <b>89</b>  |
| ->10 minutes, less than a day  | 195              | 36        | 30             | 261        | 56                | 13        | 7              | 76         |
| - a day                        | 199              | 42        | 21             | <b>262</b> | 14                | 2         | 3              | 19         |
| -up to a week                  | 84               | 19        | 16             | 109        | 10                | 3         | 1              | 14         |
| -more than a week              | 31               | 2         | 7              | 40         | 5                 | -         | -              | 5          |

| NEUROLOGICAL COMPLICATION      | <i>I DOSE(n)</i> |           |                |            | <i>II DOSE(n)</i> |           |                |            |
|--------------------------------|------------------|-----------|----------------|------------|-------------------|-----------|----------------|------------|
|                                | BNT162b2         | mRNA-1273 | ChAdOx1nCov-19 | Total      | BNT162b2          | mRNA-1273 | ChAdOx1nCov-19 | Total      |
| <b>PARESTHESIAS</b>            |                  |           |                |            |                   |           |                |            |
| <b>Onset</b>                   |                  |           |                |            |                   |           |                |            |
| <b>Acute</b>                   |                  |           |                |            |                   |           |                |            |
| -within 15 minutes             | 133              | 25        | 7              | 165        | 113               | 18        | 6              | <b>137</b> |
| -after 15 minutes              | 124              | 34        | 11             | <b>169</b> | 27                | 9         | -              | 36         |
| <b>Subacute</b>                |                  |           |                |            |                   |           |                |            |
| - first hours                  | 134              | 25        | 3              | 162        | 12                | 2         | 1              | 15         |
| - first 3 days                 | 80               | 3         | 5              | 88         | 17                | 7         | 1              | 25         |
| - from the 4th to the 7th day  | 13               | 3         | 1              | 17         | 2                 | -         | -              | 2          |
| - from the 8th to the 14th day | 8                | 2         | 3              | 13         | 1                 | -         | -              | 1          |
| <b>Duration</b>                |                  |           |                |            |                   |           |                |            |
| -<10 minutes                   | 82               | 13        | 3              | 98         | 63                | 5         | 70             | 138        |
| ->10 minutes, less than a day  | 175              | 46        | 15             | <b>236</b> | 77                | 22        | 103            | <b>202</b> |
| - a day                        | 136              | 27        | 5              | 168        | 16                | 5         | 22             | 43         |
| -up to a week                  | 67               | 24        | 4              | 95         | 13                | 4         | 18             | 35         |
| -more than a week              | 43               | 4         | 3              | 50         | 4                 | -         | 4              | 8          |

| NEUROLOGICAL COMPLICATION      | <i>I DOSE(n)</i> |           |                |            | <i>II DOSE(n)</i> |           |                |           |
|--------------------------------|------------------|-----------|----------------|------------|-------------------|-----------|----------------|-----------|
|                                | BNT162b2         | mRNA-1273 | ChAdOx1nCov-19 | Total      | BNT162b2          | mRNA-1273 | ChAdOx1nCov-19 | Total     |
| <b>COGNITIVE FOG</b>           |                  |           |                |            |                   |           |                |           |
| <b>Onset</b>                   |                  |           |                |            |                   |           |                |           |
| <b>Acute</b>                   |                  |           |                |            |                   |           |                |           |
| -within 15 minutes             | -                | -         | -              | -          | -                 | -         | -              | -         |
| -after 15 minutes              | -                | -         | -              | -          | -                 | -         | -              | -         |
| <b>Subacute</b>                |                  |           |                |            |                   |           |                |           |
| - first hours                  | 87               | 14        | 7              | 108        | 15                | 3         | -              | 18        |
| - first 3 days                 | 136              | 21        | 5              | <b>162</b> | 29                | 3         | -              | <b>32</b> |
| - from the 4th to the 7th day  | 20               | 2         | 2              | 24         | 2                 | -         | 1              | 3         |
| - from the 8th to the 14th day | 14               | -         | 3              | 17         | 5                 | -         | -              | 5         |
| <b>Duration</b>                |                  |           |                |            |                   |           |                |           |
| -<10 minutes                   | -                | -         | -              | -          | -                 | 1         | -              | 1         |
| ->10 minutes, less than a day  | -                | -         | -              | -          | 1                 | -         | -              | 1         |
| - a day                        | 99               | 15        | 12             | 126        | 23                | 2         | -              | 25        |
| -up to a week                  | 120              | 17        | 3              | <b>140</b> | 27                | 3         | 1              | <b>31</b> |
| -more than a week              | 41               | 6         | 3              | 50         | 8                 | 1         | -              | 9         |

| NEUROLOGICAL COMPLICATION      | <u>I DOSE(n)</u> |           |                |            | <u>II DOSE(n)</u> |           |                |           |
|--------------------------------|------------------|-----------|----------------|------------|-------------------|-----------|----------------|-----------|
|                                | BNT162b2         | mRNA-1273 | ChAdOx1nCov-19 | Total      | BNT162b2          | mRNA-1273 | ChAdOx1nCov-19 | Total     |
| <b>INSOMNIA</b>                |                  |           |                |            |                   |           |                |           |
| <b>Onset</b>                   |                  |           |                |            |                   |           |                |           |
| <b>Acute</b>                   |                  |           |                |            |                   |           |                |           |
| -within 15 minutes             | -                | -         | .              | -          | -                 | -         | -              | -         |
| -after 15 minutes              | -                | -         | -              | -          | -                 | -         | -              | -         |
| <b>Subacute</b>                |                  |           |                |            |                   |           |                |           |
| - first hours                  | 63               | 6         | 9              | 78         | 17                | 2         | 2              | 21        |
| - first 3 days                 | 114              | 11        | 15             | <b>140</b> | 23                | 3         | 5              | <b>31</b> |
| - from the 4th to the 7th day  | 16               | 2         | 1              | 19         | 1                 | -         | -              | 1         |
| - from the 8th to the 14th day | 10               | -         | 1              | 11         | 1                 | -         | -              | 1         |
| <b>Duration</b>                |                  |           |                |            |                   |           |                |           |
| -<10 minutes                   | -                | -         | -              | -          | -                 | -         | -              | -         |
| ->10 minutes, less than a day  | 3                | -         | 2              | 5          | -                 | -         | 1              | 1         |
| - a day                        | 84               | 10        | 7              | 101        | 10                | 2         | 4              | 16        |
| -up to a week                  | 93               | 8         | 13             | <b>114</b> | 26                | 3         | 2              | <b>31</b> |
| -more than a week              | 29               | 1         | 6              | 36         | 6                 | -         | 1              | 7         |

| NEUROLOGICAL COMPLICATION      | <u>I DOSE(n)</u> |           |                |            | <u>II DOSE(n)</u> |           |                |           |
|--------------------------------|------------------|-----------|----------------|------------|-------------------|-----------|----------------|-----------|
|                                | BNT162b2         | mRNA-1273 | ChAdOx1nCov-19 | Total      | BNT162b2          | mRNA-1273 | ChAdOx1nCov-19 | Total     |
| <b>TREMOR</b>                  |                  |           |                |            |                   |           |                |           |
| <b>Onset</b>                   |                  |           |                |            |                   |           |                |           |
| <b>Acute</b>                   |                  |           |                |            |                   |           |                |           |
| -within 15 minutes             | 19               | 3         | 3              | 25         | 2                 | -         | 1              | 3         |
| -after 15 minutes              | 50               | 18        | 40             | <b>108</b> | 1                 | -         | 2              | 3         |
| <b>Subacute</b>                |                  |           |                |            |                   |           |                |           |
| - first hours                  | 42               | 14        | 48             | 104        | 10                | 4         | 1              | 15        |
| - first 3 days                 | 36               | 17        | 21             | 74         | 23                | 9         | -              | <b>32</b> |
| - from the 4th to the 7th day  | -                | 1         | -              | 1          | 1                 | -         | -              | 1         |
| - from the 8th to the 14th day | 2                | 1         | 1              | 4          | -                 | -         | -              | -         |
| <b>Duration</b>                |                  |           |                |            |                   |           |                |           |
| -<10 minutes                   | 22               | 8         | 4              | 34         | 1                 | -         | 1              | 2         |
| ->10 minutes, less than a day  | 48               | 13        | 39             | 100        | 2                 | -         | 2              | 4         |
| - a day                        | 60               | 27        | 64             | <b>151</b> | 28                | 13        | 1              | <b>42</b> |
| -up to a week                  | 16               | 5         | 7              | 28         | 4                 | 1         | -              | 5         |
| -more than a week              | 5                | 2         | 1              | 8          | 2                 | -         | -              | 2         |

| NEUROLOGICAL COMPLICATION      | <i>I DOSE(n)</i> |           |                |            | <i>II DOSE(n)</i> |           |                |           |
|--------------------------------|------------------|-----------|----------------|------------|-------------------|-----------|----------------|-----------|
|                                | BNT162b2         | mRNA-1273 | ChAdOx1nCov-19 | Total      | BNT162b2          | mRNA-1273 | ChAdOx1nCov-19 | Total     |
| <b>MUSCLE SPASMS</b>           |                  |           |                |            |                   |           |                |           |
| <b>Onset</b>                   |                  |           |                |            |                   |           |                |           |
| <b>Acute</b>                   |                  |           |                |            |                   |           |                |           |
| -within 15 minutes             | 23               | 3         | 3              | 29         | 3                 | 1         | -              | 4         |
| -after 15 minutes              | 82               | 18        | 23             | <b>123</b> | 3                 | 1         | 1              | 5         |
| <b>Subacute</b>                |                  |           |                |            |                   |           |                |           |
| - first hours                  | 43               | 7         | 12             | 62         | 13                | 3         | 3              | 19        |
| - first 3 days                 | 52               | 12        | 11             | 75         | 12                | 5         | 3              | <b>20</b> |
| - from the 4th to the 7th day  | 7                | -         | 1              | 8          | 2                 | -         | -              | 2         |
| - from the 8th to the 14th day | 11               | 3         | 1              | 15         | 2                 | -         | -              | 2         |
| <b>Duration</b>                |                  |           |                |            |                   |           |                |           |
| -<10 minutes                   | 31               | 4         | 3              | 38         | 3                 | -         | -              | 3         |
| ->10 minutes, less than a day  | 81               | 17        | 23             | <b>121</b> | 2                 | 2         | 1              | 5         |
| - a day                        | 45               | 9         | 12             | 66         | 16                | 4         | 1              | <b>21</b> |
| -up to a week                  | 48               | 8         | 11             | 67         | 10                | 3         | -              | 13        |
| -more than a week              | 21               | 5         | 3              | 29         | 3                 | 1         | 1              | 5         |



| NEUROLOGICAL COMPLICATION      | <i>I DOSE(n)</i> |           |                |       | <i>II DOSE(n)</i> |           |                |       |
|--------------------------------|------------------|-----------|----------------|-------|-------------------|-----------|----------------|-------|
|                                | BNT162b2         | mRNA-1273 | ChAdOx1nCov-19 | Total | BNT162b2          | mRNA-1273 | ChAdOx1nCov-19 | Total |
| <b>DIPLOPIA</b>                |                  |           |                |       |                   |           |                |       |
| <b>Onset</b>                   |                  |           |                |       |                   |           |                |       |
| <b>Acute</b>                   |                  |           |                |       |                   |           |                |       |
| -within 15 minutes             | 24               | 7         | 3              | 34    | 16                | 15        | -              | 31    |
| -after 15 minutes              | 27               | 5         | 3              | 35    | 8                 | 2         | -              | 10    |
| <b>Subacute</b>                |                  |           |                |       |                   |           |                |       |
| - first hours                  | 27               | 4         | -              | 31    | 2                 | 1         | 1              | 4     |
| - first 3 days                 | 27               | 3         | 2              | 32    | 9                 | 1         | -              | 10    |
| - from the 4th to the 7th day  | 3                | -         | 2              | 5     | 1                 | -         | -              | 1     |
| - from the 8th to the 14th day | 3                | -         | 1              | 4     | -                 | -         | -              | -     |
| <b>Duration</b>                |                  |           |                |       |                   |           |                |       |
| -<10 minutes                   | 26               | 3         | 8              | 37    | 4                 | 4         | 1              | 9     |
| ->10 minutes, less than a day  | 25               | 3         | 10             | 38    | 2                 | 1         | 2              | 5     |
| - a day                        | 33               | 5         | 5              | 38    | 6                 | 2         | 3              | 11    |
| -up to a week                  | 19               | 2         | 4              | 23    | 5                 | -         | -              | 5     |
| -more than a week              | 9                | -         | 2              | 11    | 1                 | -         | -              | 1     |

| NEUROLOGICAL COMPLICATION      | <i><u>I DOSE(n)</u></i> |           |                |           | <i><u>II DOSE(n)</u></i> |           |                |           |
|--------------------------------|-------------------------|-----------|----------------|-----------|--------------------------|-----------|----------------|-----------|
|                                | BNT162b2                | mRNA-1273 | ChAdOx1nCov-19 | Total     | BNT162b2                 | mRNA-1273 | ChAdOx1nCov-19 | Total     |
| <b>TINNITUS</b>                |                         |           |                |           |                          |           |                |           |
| <b>Onset</b>                   |                         |           |                |           |                          |           |                |           |
| <b>Acute</b>                   |                         |           |                |           |                          |           |                |           |
| -within 15 minutes             | 11                      | 3         | 1              | 15        | 5                        | -         | -              | 5         |
| -after 15 minutes              | 25                      | 2         | 4              | <b>31</b> | 4                        | 3         | -              | <b>7</b>  |
| <b>Subacute</b>                |                         |           |                |           |                          |           |                |           |
| - first hours                  | 17                      | -         | 2              | 19        | 3                        | 2         | 1              | 6         |
| - first 3 days                 | 17                      | 2         | 7              | 26        | 2                        | 1         | 2              | 5         |
| - from the 4th to the 7th day  | 11                      | 1         | 1              | 13        | 1                        | -         | 1              | 2         |
| - from the 8th to the 14th day | 10                      | 2         | 1              | 13        | -                        | -         | -              | 1         |
| <b>Duration</b>                |                         |           |                |           |                          |           |                |           |
| -<10 minutes                   | 18                      | 1         | 1              | 20        | 5                        | 1         | -              | 6         |
| ->10 minutes, less than a day  | 19                      | 4         | 4              | 27        | 4                        | 2         | -              | 6         |
| - a day                        | 25                      | 1         | 2              | <b>28</b> | 5                        | 3         | 2              | <b>10</b> |
| -up to a week                  | 18                      | 2         | 7              | 27        | 1                        | -         | 1              | 2         |
| -more than a week              | 11                      | 7         | 3              | 21        | 4                        | -         | -              | 4         |

| NEUROLOGICAL COMPLICATION      | <i>I DOSE(n)</i> |           |                |       | <i>II DOSE(n)</i> |           |                |       |
|--------------------------------|------------------|-----------|----------------|-------|-------------------|-----------|----------------|-------|
|                                | BNT162b2         | mRNA-1273 | ChAdOx1nCov-19 | Total | BNT162b2          | mRNA-1273 | ChAdOx1nCov-19 | Total |
| <b>TASTE ALTERATION</b>        |                  |           |                |       |                   |           |                |       |
| <b>Onset</b>                   |                  |           |                |       |                   |           |                |       |
| <b>Acute</b>                   |                  |           |                |       |                   |           |                |       |
| -within 15 minutes             | -                | -         | -              |       | -                 | -         | -              |       |
| -after 15 minutes              | -                | -         | -              |       | -                 | -         | -              |       |
| <b>Subacute</b>                |                  |           |                |       |                   |           |                |       |
| - first hours                  | 8                | 2         | -              | 10    | 2                 | -         | -              | 2     |
| - first 3 days                 | 14               | 7         | 2              | 23    | 3                 | 2         | -              | 5     |
| - from the 4th to the 7th day  | 5                | 1         | 1              | 7     | -                 | -         | -              | -     |
| - from the 8th to the 14th day | 14               | 0         | -              | 4     | -                 | -         | -              | -     |
| <b>Duration</b>                |                  |           |                |       |                   |           |                |       |
| -<10 minutes                   | -                |           |                |       |                   |           |                |       |
| ->10 minutes, less than a day  | -                |           |                |       |                   |           |                |       |
| - a day                        | 9                | 2         | -              | 11    | 1                 | -         | -              | 1     |
| -up to a week                  | 13               | 4         | 3              | 20    | 3                 | 2         | -              | 5     |
| -more than a week              | 9                | 1         | 1              | 11    | 2                 | -         | -              | 2     |

| NEUROLOGICAL COMPLICATION      | <i>I DOSE(n)</i> |           |                |           | <i>II DOSE(n)</i> |           |                |          |
|--------------------------------|------------------|-----------|----------------|-----------|-------------------|-----------|----------------|----------|
|                                | BNT162b2         | mRNA-1273 | ChAdOx1nCov-19 | Total     | BNT162b2          | mRNA-1273 | ChAdOx1nCov-19 | Total    |
| <b>DISPHONIA</b>               |                  |           |                |           |                   |           |                |          |
| <b>Onset</b>                   |                  |           |                |           |                   |           |                |          |
| <b>Acute</b>                   |                  |           |                |           |                   |           |                |          |
| -within 15 minutes             | 3                | -         | -              | 3         | 2                 | -         | -              | 2        |
| -after 15 minutes              | 11               | 2         | 1              | 14        | 2                 | 1         | -              | 3        |
| <b>Subacute</b>                |                  |           |                |           |                   |           |                |          |
| - first hours                  | 6                | 1         | -              | 7         | 3                 | -         | -              | 3        |
| - first 3 days                 | 11               | 4         | -              | <b>15</b> | 4                 | -         | -              | <b>4</b> |
| - from the 4th to the 7th day  | 3                | -         | -              | 3         | 3                 | -         | -              | 3        |
| - from the 8th to the 14th day | 3                | -         | -              | 3         | -                 | -         | -              | -        |
| <b>Duration</b>                |                  |           |                |           |                   |           |                |          |
| -<10 minutes                   | 5                | -         | -              | 5         | 2                 | -         | -              | 2        |
| ->10 minutes, less than a day  | 10               | 2         | 1              | <b>13</b> | 2                 | -         | -              | 2        |
| - a day                        | 11               | 1         | -              | 12        | 7                 | 1         | -              | <b>8</b> |
| -up to a week                  | 7                | 4         | 1              | 12        | 1                 | -         | -              | 1        |
| -more than a week              | 5                | -         | -              | 5         | 2                 | -         | -              | 2        |

| NEUROLOGICAL COMPLICATION      | <i>I DOSE(n)</i> |           |                |       | <i>II DOSE(n)</i> |           |                |       |
|--------------------------------|------------------|-----------|----------------|-------|-------------------|-----------|----------------|-------|
|                                | BNT162b2         | mRNA-1273 | ChAdOx1nCov-19 | Total | BNT162b2          | mRNA-1273 | ChAdOx1nCov-19 | Total |
| <b>SMELL ALTERATION</b>        |                  |           |                |       |                   |           |                |       |
| <b>Onset</b>                   |                  |           |                |       |                   |           |                |       |
| <b>Acute</b>                   |                  |           |                |       |                   |           |                |       |
| -within 15 minutes             | -                | -         | -              | -     | -                 | -         | -              | -     |
| -after 15 minutes              | -                | -         | -              | -     | -                 | -         | -              | -     |
| <b>Subacute</b>                |                  |           |                |       |                   |           |                |       |
| - first hours                  | 4                | 2         | -              | 5     | 2                 | -         | 2              | 4     |
| - first 3 days                 | 11               | 3         | 2              | 16    | 2                 | -         | 2              | 4     |
| - from the 4th to the 7th day  | -                | 1         | 1              | 2     | -                 | -         | -              | -     |
| - from the 8th to the 14th day | 2                | -         | -              | 2     | -                 | -         | -              | -     |
| <b>Duration</b>                |                  |           |                |       |                   |           |                |       |
| -<10 minutes                   |                  |           |                |       |                   |           |                |       |
| ->10 minutes, less than a day  | -                | -         | -              | -     | -                 | -         | -              |       |
| - a day                        | 5                | 1         | -              | 6     | -                 | -         | -              |       |
| -up to a week                  | 5                | 2         | -              | 7     | 3                 | 3         | -              | 6     |
| -more than a week              | 7                | 3         | -              | 10    | 2                 | 1         | -              | 3     |
