# Supplementary material for: NEURO-COVAX: An Italian Population-Based Study of Neurological Complications after COVID-19 Vaccinations
Source: MDPI journal article supplement (doi:10.3390/vaccines11101621), 2023-10-21
Supplement: s1 [file s1]

This study was approved by the National Ethical Committee Spallanzani, National Institute for Infectious Diseases Lazzaro Spallanzani, Rome, Italy under the project ID Number 362

## NEURO-COVAX QUESTIONNAIRE

*FIRST DOSE-Acute*

### SECTION I- VACCINATION INFORMATION

Vaccine center:

Date of administration:

Vaccine:

### SECTION II-PERSONAL DATA

Surname and name:

Date of birth:

Telephone number/e-mail address and residence:

### SECTION III: NEUROLOGICAL COMPLICATION LIST

Did you experience neurological symptoms after receiving the vaccine?

☐ None

☐ If yes, which of the following symptoms (indicate one or more symptoms)

- ☐ Vertigo
- ☐ Headache
- ☐ Muscle pain
- ☐ Muscle spasms
- ☐ Paresthesias (tingling and sensitivity changes)
- ☐ Tremor
- ☐ Double vision
- ☐ Tinnitus (ringing in the ears)
- ☐ Dysphonia (voice changes)
- ☐ Excessive daytime sleepiness
- ☐ Other

### SECTION IV: NEUROLOGICAL COMPLICATION CHARACTERIZATION (SYMPTOM BOX)

Indicate for each of the symptoms in the relevant section, the appearance and duration.

|                                                                                                                     |
|---------------------------------------------------------------------------------------------------------------------|
| <b>Vertigo</b>                                                                                                      |
| When did they appear?<br><input type="checkbox"/> in the first 15 minutes <input type="checkbox"/> after 15 minutes |
| How long did they last?<br><input type="checkbox"/> 5-10 minutes <input type="checkbox"/> more than 10 minutes      |

|                 |
|-----------------|
| <b>Headache</b> |
|-----------------|

|                                                                                                                     |
|---------------------------------------------------------------------------------------------------------------------|
| When did they appear?<br><input type="checkbox"/> in the first 15 minutes <input type="checkbox"/> after 15 minutes |
| How long did they last?<br><input type="checkbox"/> 5-10 minutes <input type="checkbox"/> more than 10 minutes      |

|                                                                                                                     |
|---------------------------------------------------------------------------------------------------------------------|
| <b>Muscle Pain</b>                                                                                                  |
| When did they appear?<br><input type="checkbox"/> in the first 15 minutes <input type="checkbox"/> after 15 minutes |
| How long did they last?<br><input type="checkbox"/> 5-10 minutes <input type="checkbox"/> more than 10 minutes      |

|                                                                                                                     |
|---------------------------------------------------------------------------------------------------------------------|
| <b>Muscle Spasm</b>                                                                                                 |
| When did they appear?<br><input type="checkbox"/> in the first 15 minutes <input type="checkbox"/> after 15 minutes |
| How long did they last?<br><input type="checkbox"/> 5-10 minutes <input type="checkbox"/> more than 10 minutes      |

|                                                                                                                     |
|---------------------------------------------------------------------------------------------------------------------|
| <b>Paresthesias (tingling and sensitivity changes)</b>                                                              |
| When did they appear?<br><input type="checkbox"/> in the first 15 minutes <input type="checkbox"/> after 15 minutes |
| How long did they last?<br><input type="checkbox"/> 5-10 minutes <input type="checkbox"/> more than 10 minutes      |

|                                                                                                                     |
|---------------------------------------------------------------------------------------------------------------------|
| <b>Tremor</b>                                                                                                       |
| When did they appear?<br><input type="checkbox"/> in the first 15 minutes <input type="checkbox"/> after 15 minutes |
| How long did they last?<br><input type="checkbox"/> 5-10 minutes <input type="checkbox"/> more than 10 minutes      |

|                                                                                                                     |
|---------------------------------------------------------------------------------------------------------------------|
| <b>Diplopia</b>                                                                                                     |
| When did they appear?<br><input type="checkbox"/> in the first 15 minutes <input type="checkbox"/> after 15 minutes |
| How long did they last?<br><input type="checkbox"/> 5-10 minutes <input type="checkbox"/> more than 10 minutes      |

|                                                                                                                     |
|---------------------------------------------------------------------------------------------------------------------|
| <b>Tinnitus (ringing in the ears)</b>                                                                               |
| When did they appear?<br><input type="checkbox"/> in the first 15 minutes <input type="checkbox"/> after 15 minutes |

|                                                                                                                |
|----------------------------------------------------------------------------------------------------------------|
| How long did they last?<br><input type="checkbox"/> 5-10 minutes <input type="checkbox"/> more than 10 minutes |
|----------------------------------------------------------------------------------------------------------------|

|                                                                                                                     |
|---------------------------------------------------------------------------------------------------------------------|
| <b>Dysphonia (alteration of the voice)</b>                                                                          |
| When did they appear?<br><input type="checkbox"/> in the first 15 minutes <input type="checkbox"/> after 15 minutes |
| How long did they last?<br><input type="checkbox"/> 5-10 minutes <input type="checkbox"/> more than 10 minutes      |

|                                                                                                                     |
|---------------------------------------------------------------------------------------------------------------------|
| <b>Excessive daytime sleepiness</b>                                                                                 |
| When did they appear?<br><input type="checkbox"/> in the first 15 minutes <input type="checkbox"/> after 15 minutes |
| How long did they last?<br><input type="checkbox"/> 5-10 minutes <input type="checkbox"/> more than 10 minutes      |

|                                                                                                                     |
|---------------------------------------------------------------------------------------------------------------------|
| <b>Other</b>                                                                                                        |
| When did they appear?<br><input type="checkbox"/> in the first 15 minutes <input type="checkbox"/> after 15 minutes |
| How long did they last?<br><input type="checkbox"/> 5-10 minutes <input type="checkbox"/> more than 10 minutes      |

**Date** \_\_\_\_\_  
**Signature** \_\_\_\_\_

## NEURO-COVAX QUESTIONNAIRE

FIRST DOSE-Subacute

### SECTION I- VACCINATION INFORMATION

Vaccine center:

Date of administration:

Vaccine:

### SECTION II-PERSONAL DATA

Surname and name:

Date of birth:

Telephone number/e-mail address and residence:

### SECTION III: NEUROLOGICAL COMPLICATION LIST

Did you experience neurological symptoms after receiving the vaccine?

☐ None

☐ If yes, which of the following symptoms (indicate one or more symptoms)

- ☐ Vertigo
- ☐ Headache
- ☐ Muscle pain
- ☐ Muscle spasms
- ☐ Paresthesias (tingling and sensitivity changes)
- ☐ Tremor
- ☐ Double vision
- ☐ Tinnitus (ringing in the ears)
- ☐ Dysphonia (voice changes)
- ☐ Excessive daytime sleepiness
- ☐ Insomnia
- ☐ Cognitive Fog
- ☐ Smell alterations
- ☐ Taste alterations
- ☐ Other

### SECTION IV: NEUROLOGICAL COMPLICATION CHARACTERIZATION (SYMPTOM BOX)

Indicate for each of the symptoms in the relevant section, the appearance and duration.

|                                                                                                                                                                                                                              |
|------------------------------------------------------------------------------------------------------------------------------------------------------------------------------------------------------------------------------|
| <b>Vertigo</b>                                                                                                                                                                                                               |
| When did they appear?<br><input type="checkbox"/> in the first hours <input type="checkbox"/> in the first 3 days <input type="checkbox"/> from the 4th to the 7th day <input type="checkbox"/> from the 8th to the 14th day |
| How long did they last?<br><input type="checkbox"/> less than a day <input type="checkbox"/> up to a week <input type="checkbox"/> over a week                                                                               |

|                                                                                                                                                                                                                              |
|------------------------------------------------------------------------------------------------------------------------------------------------------------------------------------------------------------------------------|
| <b>Headache</b>                                                                                                                                                                                                              |
| When did they appear?<br><input type="checkbox"/> in the first hours <input type="checkbox"/> in the first 3 days <input type="checkbox"/> from the 4th to the 7th day <input type="checkbox"/> from the 8th to the 14th day |

How long did they last?

☐ less than a day ☐ up to a week ☐ over a week

### **Muscle Pain**

When did they appear?

☐ in the first hours ☐ in the first 3 days ☐ from the 4th to the 7th day ☐ from the 8th to the 14th day

How long did they last?

☐ less than a day ☐ up to a week ☐ over a week

### **Muscle Spasm**

When did they appear?

☐ in the first hours ☐ in the first 3 days ☐ from the 4th to the 7th day ☐ from the 8th to the 14th day

How long did they last?

☐ less than a day ☐ up to a week ☐ over a week

### **Paresthesias (tingling and sensitivity changes)**

When did they appear?

☐ in the first hours ☐ in the first 3 days ☐ from the 4th to the 7th day ☐ from the 8th to the 14th day

How long did they last?

☐ less than a day ☐ up to a week ☐ over a week

### **Tremor**

When did they appear?

☐ in the first hours ☐ in the first 3 days ☐ from the 4th to the 7th day ☐ from the 8th to the 14th day

How long did they last?

☐ less than a day ☐ up to a week ☐ over a week

### **Diplopia**

When did they appear?

☐ in the first hours ☐ in the first 3 days ☐ from the 4th to the 7th day ☐ from the 8th to the 14th day

How long did they last?

☐ less than a day ☐ up to a week ☐ over a week

### **Tinnitus (ringing in the ears)**

How long did they last?

☐ less than a day ☐ up to a week ☐ over a week

How long did they last?

☐ less than a day ☐ up to a week ☐ over a week

### **Dysphonia (alteration of the voice)**

When did they appear?

☐ in the first hours ☐ in the first 3 days ☐ from the 4th to the 7th day ☐ from the 8th to the 14th day

How long did they last?

☐ less than a day ☐ up to a week ☐ over a week

### **Excessive daytime sleepiness**

When did they appear?

☐ in the first hours ☐ in the first 3 days ☐ from the 4th to the 7th day ☐ from the 8th to the 14th day

How long did they last?

☐ less than a day ☐ up to a week ☐ over a week

### **Insomnia**

When did they appear?

☐ in the first hours ☐ in the first 3 days ☐ from the 4th to the 7th day ☐ from the 8th to the 14th day

How long did they last?

☐ less than a day ☐ up to a week ☐ over a week

### **Cognitive Fog**

When did they appear?

☐ in the first hours ☐ in the first 3 days ☐ from the 4th to the 7th day ☐ from the 8th to the 14th day

How long did they last?

☐ less than a day ☐ up to a week ☐ over a week

|  |
|--|
|  |
|--|

|                                                                                                                                                                                                                              |
|------------------------------------------------------------------------------------------------------------------------------------------------------------------------------------------------------------------------------|
| <b>Smell Alterations</b>                                                                                                                                                                                                     |
| When did they appear?<br><input type="checkbox"/> in the first hours <input type="checkbox"/> in the first 3 days <input type="checkbox"/> from the 4th to the 7th day <input type="checkbox"/> from the 8th to the 14th day |
| How long did they last?<br><input type="checkbox"/> less than a day <input type="checkbox"/> up to a week <input type="checkbox"/> over a week                                                                               |

|                                                                                                                                                                                                                              |
|------------------------------------------------------------------------------------------------------------------------------------------------------------------------------------------------------------------------------|
| <b>Taste Alterations</b>                                                                                                                                                                                                     |
| When did they appear?<br><input type="checkbox"/> in the first hours <input type="checkbox"/> in the first 3 days <input type="checkbox"/> from the 4th to the 7th day <input type="checkbox"/> from the 8th to the 14th day |
| How long did they last?<br><input type="checkbox"/> less than a day <input type="checkbox"/> up to a week <input type="checkbox"/> over a week                                                                               |

|                                                                                                                                                                                                                              |
|------------------------------------------------------------------------------------------------------------------------------------------------------------------------------------------------------------------------------|
| <b>Other</b>                                                                                                                                                                                                                 |
| When did they appear?<br><input type="checkbox"/> in the first hours <input type="checkbox"/> in the first 3 days <input type="checkbox"/> from the 4th to the 7th day <input type="checkbox"/> from the 8th to the 14th day |
| How long did they last?<br><input type="checkbox"/> less than a day <input type="checkbox"/> up to a week <input type="checkbox"/> over a week                                                                               |

**Date** \_\_\_\_\_  
**Signature** \_\_\_\_\_

## **NEURO-COVAX QUESTIONNAIRE**

*SECOND DOSE-Acute*

### **SECTION I- VACCINATION INFORMATION**

Vaccine center:

Date of administration:

Vaccine:

### **SECTION II-PERSONAL DATA**

Surname and name:

Date of birth:

Telephone number/e-mail address and residence:

### **SECTION III: NEUROLOGICAL COMPLICATION LIST**

Did you experience neurological symptoms after receiving the vaccine?

☐ None

☐ If yes, which of the following symptoms (indicate one or more symptoms)

☐ Vertigo

☐ Headache

☐ Muscle pain

☐ Muscle spasms

☐ Paresthesias (tingling and sensitivity changes)

☐ Tremor

☐ Double vision

☐ Tinnitus (ringing in the ears)

☐ Dysphonia (voice changes)

☐ Excessive daytime sleepiness

☐ Other

### **SECTION IV: NEUROLOGICAL COMPLICATION CHARACTERIZATION (SYMPTOM BOX)**

Indicate for each of the symptoms in the relevant section, the appearance and duration.

|                                                                                                                     |
|---------------------------------------------------------------------------------------------------------------------|
| <b>Vertigo</b>                                                                                                      |
| When did they appear?<br><input type="checkbox"/> in the first 15 minutes <input type="checkbox"/> after 15 minutes |
| How long did they last?<br><input type="checkbox"/> 5-10 minutes <input type="checkbox"/> more than 10 minutes      |

|                                                                                                                     |
|---------------------------------------------------------------------------------------------------------------------|
| <b>Headache</b>                                                                                                     |
| When did they appear?<br><input type="checkbox"/> in the first 15 minutes <input type="checkbox"/> after 15 minutes |
| How long did they last?                                                                                             |



|                                                                                     |
|-------------------------------------------------------------------------------------|
| <input type="checkbox"/> 5-10 minutes <input type="checkbox"/> more than 10 minutes |
|-------------------------------------------------------------------------------------|

|                                                                                                                     |
|---------------------------------------------------------------------------------------------------------------------|
| <b>Muscle Pain</b>                                                                                                  |
| When did they appear?<br><input type="checkbox"/> in the first 15 minutes <input type="checkbox"/> after 15 minutes |
| How long did they last?<br><input type="checkbox"/> 5-10 minutes <input type="checkbox"/> more than 10 minutes      |

|                                                                                                                     |
|---------------------------------------------------------------------------------------------------------------------|
| <b>Muscle Spasm</b>                                                                                                 |
| When did they appear?<br><input type="checkbox"/> in the first 15 minutes <input type="checkbox"/> after 15 minutes |
| How long did they last?<br><input type="checkbox"/> 5-10 minutes <input type="checkbox"/> more than 10 minutes      |

|                                                                                                                     |
|---------------------------------------------------------------------------------------------------------------------|
| <b>Paresthesias (tingling and sensitivity changes)</b>                                                              |
| When did they appear?<br><input type="checkbox"/> in the first 15 minutes <input type="checkbox"/> after 15 minutes |
| How long did they last?<br><input type="checkbox"/> 5-10 minutes <input type="checkbox"/> more than 10 minutes      |

|                                                                                                                     |
|---------------------------------------------------------------------------------------------------------------------|
| <b>Tremor</b>                                                                                                       |
| When did they appear?<br><input type="checkbox"/> in the first 15 minutes <input type="checkbox"/> after 15 minutes |
| How long did they last?<br><input type="checkbox"/> 5-10 minutes <input type="checkbox"/> more than 10 minutes      |

|                                                                                                                     |
|---------------------------------------------------------------------------------------------------------------------|
| <b>Diplopia</b>                                                                                                     |
| When did they appear?<br><input type="checkbox"/> in the first 15 minutes <input type="checkbox"/> after 15 minutes |
| How long did they last?<br><input type="checkbox"/> 5-10 minutes <input type="checkbox"/> more than 10 minutes      |

|                                                                                                                     |
|---------------------------------------------------------------------------------------------------------------------|
| <b>Tinnitus (ringing in the ears)</b>                                                                               |
| When did they appear?<br><input type="checkbox"/> in the first 15 minutes <input type="checkbox"/> after 15 minutes |
| How long did they last?<br><input type="checkbox"/> 5-10 minutes <input type="checkbox"/> more than 10 minutes      |

|                                            |
|--------------------------------------------|
| <b>Dysphonia (alteration of the voice)</b> |
|--------------------------------------------|

|                                                                                                                     |
|---------------------------------------------------------------------------------------------------------------------|
| When did they appear?<br><input type="checkbox"/> in the first 15 minutes <input type="checkbox"/> after 15 minutes |
| How long did they last?<br><input type="checkbox"/> 5-10 minutes <input type="checkbox"/> more than 10 minutes      |

|                                                                                                                     |
|---------------------------------------------------------------------------------------------------------------------|
| <b>Excessive daytime sleepiness</b>                                                                                 |
| When did they appear?<br><input type="checkbox"/> in the first 15 minutes <input type="checkbox"/> after 15 minutes |
| How long did they last?<br><input type="checkbox"/> 5-10 minutes <input type="checkbox"/> more than 10 minutes      |

|                                                                                                                     |
|---------------------------------------------------------------------------------------------------------------------|
| <b>Other</b>                                                                                                        |
| When did they appear?<br><input type="checkbox"/> in the first 15 minutes <input type="checkbox"/> after 15 minutes |
| How long did they last?<br><input type="checkbox"/> 5-10 minutes <input type="checkbox"/> more than 10 minutes      |

**Date** \_\_\_\_\_  
**Signature** \_\_\_\_\_

## NEURO-COVAX QUESTIONNAIRE

SECOND DOSE-Subacute

### SECTION I- VACCINATION INFORMATION

Vaccine center:

Date of administration:

Vaccine:

### SECTION II-PERSONAL DATA

Surname and name:

Date of birth:

Telephone number/e-mail address and residence:

### SECTION III: NEUROLOGICAL COMPLICATION LIST

Did you experience neurological symptoms after receiving the vaccine?

☐ None

☐ If yes, which of the following symptoms (indicate one or more symptoms)

☐ Vertigo

☐ Headache

☐ Muscle pain

☐ Muscle spasms

☐ Paresthesias (tingling and sensitivity changes)

☐ Tremor

☐ Double vision

☐ Tinnitus (ringing in the ears)

☐ Dysphonia (voice changes)

☐ Excessive daytime sleepiness

☐ Insomnia

☐ Cognitive Fog

☐ Smell alterations

☐ Taste alterations

☐ Other

### SECTION IV: NEUROLOGICAL COMPLICATION CHARACTERIZATION (SYMPTOM BOX)

Indicate for each of the symptoms in the relevant section, the appearance and duration.

|                                                                                                                                                                                                                              |
|------------------------------------------------------------------------------------------------------------------------------------------------------------------------------------------------------------------------------|
| <b>Vertigo</b>                                                                                                                                                                                                               |
| When did they appear?<br><input type="checkbox"/> in the first hours <input type="checkbox"/> in the first 3 days <input type="checkbox"/> from the 4th to the 7th day <input type="checkbox"/> from the 8th to the 14th day |
| How long did they last?<br><input type="checkbox"/> less than a day <input type="checkbox"/> up to a week <input type="checkbox"/> over a week                                                                               |

|                 |
|-----------------|
| <b>Headache</b> |
|-----------------|

|                                                                                                                                                                                                                              |
|------------------------------------------------------------------------------------------------------------------------------------------------------------------------------------------------------------------------------|
| When did they appear?<br><input type="checkbox"/> in the first hours <input type="checkbox"/> in the first 3 days <input type="checkbox"/> from the 4th to the 7th day <input type="checkbox"/> from the 8th to the 14th day |
| How long did they last?<br><input type="checkbox"/> less than a day <input type="checkbox"/> up to a week <input type="checkbox"/> over a week                                                                               |

|                                                                                                                                                                                                                              |
|------------------------------------------------------------------------------------------------------------------------------------------------------------------------------------------------------------------------------|
| <b>Muscle Pain</b>                                                                                                                                                                                                           |
| When did they appear?<br><input type="checkbox"/> in the first hours <input type="checkbox"/> in the first 3 days <input type="checkbox"/> from the 4th to the 7th day <input type="checkbox"/> from the 8th to the 14th day |
| How long did they last?<br><input type="checkbox"/> less than a day <input type="checkbox"/> up to a week <input type="checkbox"/> over a week                                                                               |

|                                                                                                                                                                                                                              |
|------------------------------------------------------------------------------------------------------------------------------------------------------------------------------------------------------------------------------|
| <b>Muscle Spasm</b>                                                                                                                                                                                                          |
| When did they appear?<br><input type="checkbox"/> in the first hours <input type="checkbox"/> in the first 3 days <input type="checkbox"/> from the 4th to the 7th day <input type="checkbox"/> from the 8th to the 14th day |
| How long did they last?<br><input type="checkbox"/> less than a day <input type="checkbox"/> up to a week <input type="checkbox"/> over a week                                                                               |

|                                                                                                                                                                                                                              |
|------------------------------------------------------------------------------------------------------------------------------------------------------------------------------------------------------------------------------|
| <b>Paresthesias (tingling and sensitivity changes)</b>                                                                                                                                                                       |
| When did they appear?<br><input type="checkbox"/> in the first hours <input type="checkbox"/> in the first 3 days <input type="checkbox"/> from the 4th to the 7th day <input type="checkbox"/> from the 8th to the 14th day |
| How long did they last?<br><input type="checkbox"/> less than a day <input type="checkbox"/> up to a week <input type="checkbox"/> over a week                                                                               |

|                                                                                                                                                                                                                              |
|------------------------------------------------------------------------------------------------------------------------------------------------------------------------------------------------------------------------------|
| <b>Tremor</b>                                                                                                                                                                                                                |
| When did they appear?<br><input type="checkbox"/> in the first hours <input type="checkbox"/> in the first 3 days <input type="checkbox"/> from the 4th to the 7th day <input type="checkbox"/> from the 8th to the 14th day |
| How long did they last?<br><input type="checkbox"/> less than a day <input type="checkbox"/> up to a week <input type="checkbox"/> over a week                                                                               |

|                 |
|-----------------|
| <b>Diplopia</b> |
|-----------------|

When did they appear?

☐ in the first hours ☐ in the first 3 days ☐ from the 4th to the 7th day ☐ from the 8th to the 14th day

How long did they last?

☐ less than a day ☐ up to a week ☐ over a week

### **Tinnitus (ringing in the ears)**

How long did they last?

☐ less than a day ☐ up to a week ☐ over a week

How long did they last?

☐ less than a day ☐ up to a week ☐ over a week

### **Dysphonia (alteration of the voice)**

When did they appear?

☐ in the first hours ☐ in the first 3 days ☐ from the 4th to the 7th day ☐ from the 8th to the 14th day

How long did they last?

☐ less than a day ☐ up to a week ☐ over a week

### **Excessive daytime sleepiness**

When did they appear?

☐ in the first hours ☐ in the first 3 days ☐ from the 4th to the 7th day ☐ from the 8th to the 14th day

How long did they last?

☐ less than a day ☐ up to a week ☐ over a week

### **Insomnia**

When did they appear?

☐ in the first hours ☐ in the first 3 days ☐ from the 4th to the 7th day ☐ from the 8th to the 14th day

How long did they last?

☐ less than a day ☐ up to a week ☐ over a week

### **Cognitive Fog**

When did they appear?

|                                                                                                                                                                                                     |
|-----------------------------------------------------------------------------------------------------------------------------------------------------------------------------------------------------|
| <input type="checkbox"/> in the first hours <input type="checkbox"/> in the first 3 days <input type="checkbox"/> from the 4th to the 7th day <input type="checkbox"/> from the 8th to the 14th day |
| How long did they last?<br><input type="checkbox"/> less than a day <input type="checkbox"/> up to a week <input type="checkbox"/> over a week                                                      |

|                                                                                                                                                                                                                              |
|------------------------------------------------------------------------------------------------------------------------------------------------------------------------------------------------------------------------------|
| <b>Smell Alterations</b>                                                                                                                                                                                                     |
| When did they appear?<br><input type="checkbox"/> in the first hours <input type="checkbox"/> in the first 3 days <input type="checkbox"/> from the 4th to the 7th day <input type="checkbox"/> from the 8th to the 14th day |
| How long did they last?<br><input type="checkbox"/> less than a day <input type="checkbox"/> up to a week <input type="checkbox"/> over a week                                                                               |

|                                                                                                                                                                                                                              |
|------------------------------------------------------------------------------------------------------------------------------------------------------------------------------------------------------------------------------|
| <b>Taste Alterations</b>                                                                                                                                                                                                     |
| When did they appear?<br><input type="checkbox"/> in the first hours <input type="checkbox"/> in the first 3 days <input type="checkbox"/> from the 4th to the 7th day <input type="checkbox"/> from the 8th to the 14th day |
| How long did they last?<br><input type="checkbox"/> less than a day <input type="checkbox"/> up to a week <input type="checkbox"/> over a week                                                                               |

|                                                                                                                                                                                                                              |
|------------------------------------------------------------------------------------------------------------------------------------------------------------------------------------------------------------------------------|
| <b>Other</b>                                                                                                                                                                                                                 |
| When did they appear?<br><input type="checkbox"/> in the first hours <input type="checkbox"/> in the first 3 days <input type="checkbox"/> from the 4th to the 7th day <input type="checkbox"/> from the 8th to the 14th day |
| How long did they last?<br><input type="checkbox"/> less than a day <input type="checkbox"/> up to a week <input type="checkbox"/> over a week                                                                               |

Date \_\_\_\_\_  
Signature \_\_\_\_\_
