# Supplementary material for: NEURO-COVAX: An Italian Population-Based Study of Neurological Complications after COVID-19 Vaccinations
Source: Vaccines (Basel). 2023 Oct 21;11(10):1621. doi: 10.3390/vaccines11101621 (PMC10610846; doi:10.3390/vaccines11101621)
Supplement: Supplementary file 1 [file vaccines-11-01621-s001.zip]

Archive with 4 entries (4 files):
- New Supplementary Figure 1.jpg
- Salsone M et al., Supplematary NEURO-COVAX QUESTIONNAIRE.pdf
- Supplementary Table S1.pdf
- Supplemetary Figure 2.jpg
